# Supplementary material for: Human Dectin-1 is O-glycosylated and serves as a ligand for C-type lectin receptor CLEC-2
Source: eLife journal article supplement (doi:10.7554/elife.83037), 2022-12-08
Supplement: supp [file Figure 1-figure supplement 1-source data 1.xlsx]

## Sheet: Sheet1
Peptide	Observed	Mr (expt)	Mr (calc)	Head	Tail	Corresponding sequence
#1	550.29	1098.57	1098.56	79	86	RFCQYVVK
#2	598.233	1194.45	1194.45	99	107	CSPCDTNWR
#3	717.793	1433.57	1433.57	108	118	YYGDSCYGFFR
#4	729.341	1456.67	1456.67	128	139	QYCTDMNATLLK
#5	706.793	1411.57	1411.58	191	202	GNMNCAYFHNGK
#6	582.251	1162.49	1162.49	203	211	MHPTFCENK
